# Supplementary material
Source: PubMed Central journal article supplement (PMC317310)
Supplement: 1471-2407-3-31-S4.pdf [file 1471-2407-3-31-S4.pdf]

Supplemental Table 4: Expression of genes associated with over-represented keywords

| hypoxia | angiogenesis | tnf | apoptosis | interferon | resistance | metastasis | kidney | log <sub>2</sub> ratio | Gene Symbol* | Title                                                                 |
|---------|--------------|-----|-----------|------------|------------|------------|--------|------------------------|--------------|-----------------------------------------------------------------------|
| ■       | ■            |     | ■         |            |            |            |        | 4.6                    | ANGPTL4      | angiopoietin-like 4                                                   |
| ■       |              |     |           |            |            | ■          | ■      | 4.1                    | CA9          | carbonic anhydrase IX                                                 |
|         |              | ■   |           |            |            |            |        | 4.0                    | TNFAIP6      | tumor necrosis factor, alpha-induced protein 6                        |
|         | ■            |     |           |            |            |            |        | 3.5                    | ANGPT2       | angiopoietin 2                                                        |
|         |              | ■   |           |            |            |            |        | 3.4                    | C3           | complement component 3                                                |
| ■       |              |     | ■         |            |            |            |        | 3.3                    | IGFBP3       | insulin-like growth factor binding protein 3                          |
|         |              |     |           |            | ■          |            |        | 3.1                    | VWF          | von Willebrand factor                                                 |
|         |              |     |           |            |            | ■          | ■      | 3.0                    | GPR54        | G protein-coupled receptor 54                                         |
|         |              | ■   | ■         |            |            |            |        | 3.0                    | TNFSF7       | tumor necrosis factor (ligand) superfamily, member 7                  |
|         |              |     |           |            |            |            | ■      | 3.0                    | RGS5         | regulator of G-protein signalling 5                                   |
|         |              |     |           |            |            |            |        | 2.9                    | GBP5         | guanylate binding protein 5                                           |
| ■       |              |     |           |            |            |            |        | 2.9                    | HIG2         | hypoxia-inducible protein 2                                           |
|         |              |     | ■         |            |            |            |        | 2.8                    | NOL3         | nucleolar protein 3 (apoptosis repressor with CARD domain)            |
|         |              | ■   | ■         | ■          | ■          | ■          | ■      | 2.7                    | CXCR4        | chemokine (C-X-C motif) receptor 4                                    |
|         |              |     |           |            |            |            | ■      | 2.7                    | CAV1         | caveolin 1, caveolae protein, 22kDa                                   |
|         |              |     | ■         |            |            |            |        | 2.5                    | ASC          | apoptosis-associated speck-like protein containing a CARD             |
|         | ■            |     |           |            |            |            |        | 2.5                    | HEY1         | hairy/enhancer-of-split related with YRPW motif 1                     |
|         |              |     | ■         |            |            |            |        | 2.4                    | LGALS1       | lectin, galactoside-binding, soluble, 1 (galectin 1)                  |
|         |              | ■   |           |            |            |            |        | 2.4                    | ITGA4        | integrin, alpha 4 (antigen CD49D, alpha 4 subunit of VLA-4 receptor)  |
|         |              |     |           |            | ■          |            |        | 2.3                    | MNDA         | myeloid cell nuclear differentiation antigen                          |
|         |              |     |           |            | ■          |            |        | 2.3                    | ISG20        | interferon stimulated gene 20kDa                                      |
|         |              |     | ■         |            |            |            |        | 2.3                    | KIAA1373     | KIAA1373 protein                                                      |
|         |              |     | ■         |            |            |            |        | 2.2                    | SCARB1       | scavenger receptor class B, member 1                                  |
|         |              |     |           |            | ■          |            |        | 2.1                    | PLA2G7       | phospholipase A2, group VII                                           |
|         |              |     | ■         |            |            |            |        | 2.1                    | ARHGDI3      | Rho GDP dissociation inhibitor (GDI) beta                             |
| ■       |              |     | ■         |            |            |            |        | 2.1                    | RTP801       | HIF-1 responsive RTP801                                               |
|         | ■            |     |           |            |            |            |        | 2.1                    | SDC3         | syndecan 3 (N-syndecan)                                               |
|         |              |     | ■         |            |            |            |        | 2.1                    | LMNB1        | lamin B1                                                              |
|         |              | ■   | ■         |            |            |            |        | 2.0                    | TNFSF13B     | tumor necrosis factor (ligand) superfamily, member 13b                |
|         | ■            |     |           |            |            |            |        | 2.0                    | PECAM1       | platelet/endothelial cell adhesion molecule (CD31 antigen)            |
|         |              |     | ■         |            |            |            |        | 2.0                    | LZTS1        | leucine zipper, putative tumor suppressor 1                           |
|         |              |     |           |            |            |            | ■      | 2.0                    | STC2         | stanniocalcin 2                                                       |
|         |              | ■   |           |            |            |            |        | 2.0                    | CD86         | CD86 antigen (CD28 antigen ligand 2, B7-2 antigen)                    |
|         |              |     | ■         |            |            |            |        | 2.0                    | ENTPD1       | ectonucleoside triphosphate diphosphohydrolase 1                      |
|         |              | ■   |           |            |            |            | ■      | 2.0                    | ITGB2        | integrin, beta 2 (antigen CD18 (p95) beta subunit)                    |
|         |              |     |           |            |            |            | ■      | 1.9                    | CST          | cerebroside sulfotransferase                                          |
|         | ■            |     |           |            |            |            |        | 1.9                    | TIE          | tyrosine kinase with immunoglobulin and epidermal GF homology domains |
|         |              | ■   | ■         |            |            |            |        | 1.9                    | PTPRC        | protein tyrosine phosphatase, receptor type, C                        |

|               |           |      |               |                                                                                  |
|---------------|-----------|------|---------------|----------------------------------------------------------------------------------|
|               | ■         | 1.9  | PSMB9         | proteasome (prosome, macropain) subunit, beta type, 9                            |
|               | ■         | 1.9  | PRF1          | perforin 1 (pore forming protein)                                                |
|               |           | 1.9  | ITGA5         | integrin, alpha 5 (fibronectin receptor, alpha polypeptide)                      |
|               | ■ ■ ■ ■ ■ | 1.9  | CCR5          | chemokine (C-C motif) receptor 5                                                 |
|               | ■         | 1.8  | BIRC5         | baculoviral IAP repeat-containing 5 (survivin)                                   |
| ■ ■ ■ ■ ■ ■ ■ | ■         | 1.8  | CCL5          | chemokine (C-C motif) ligand 5                                                   |
| ■             |           | 1.8  | PLOD2         | procollagen-lysine, 2-oxoglutarate 5-dioxygenase (lysine hydroxylase) 2          |
|               |           | 1.8  | GPR4          | G protein-coupled receptor 4                                                     |
|               | ■         | 1.8  | GZMB          | granzyme B                                                                       |
|               | ■ ■       | 1.8  | TLR2          | toll-like receptor 2                                                             |
|               | ■         | 1.8  | GBP2          | guanylate binding protein 2, interferon-inducible                                |
|               | ■         | 1.8  | LOC64167      | aminopeptidase                                                                   |
| ■             |           | 1.8  | ADORA3        | adenosine A3 receptor                                                            |
|               | ■         | 1.7  | GNLY          | granulysin                                                                       |
|               | ■         | 1.7  | MCAM          | melanoma cell adhesion molecule                                                  |
|               | ■         | 1.7  | D2S448        | Melanoma associated gene                                                         |
| ■             | ■         | 1.7  | BIRC3         | baculoviral IAP repeat-containing 3                                              |
|               | ■         | 1.7  | CX3CR1        | chemokine (C-X3-C motif) receptor 1                                              |
|               | ■         | 1.7  | C1QA          | complement component 1, q subcomponent, alpha polypeptide                        |
|               |           | 1.7  | SEMA5B        | sema domain, seven thrombospondin repeats (type 1 and type 1-like)               |
| ■ ■ ■ ■ ■     | ■         | 1.7  | EDN1          | endothelin 1                                                                     |
|               | ■         | 1.7  | TIMP1         | tissue inhibitor of metalloproteinase 1                                          |
|               | ■         | 1.7  | ARRB2         | arrestin, beta 2                                                                 |
| ■ ■ ■ ■ ■ ■ ■ | ■         | 1.7  | VEGF          | vascular endothelial growth factor                                               |
| ■             |           | 1.7  | DKFZp434K1210 | hypothetical protein DKFZp434K1210                                               |
|               | ■         | 1.6  | FXYS5         | FXYS domain containing ion transport regulator 5                                 |
| ■             |           | 1.6  | ESM1          | endothelial cell-specific molecule 1                                             |
| <hr/>         |           |      |               |                                                                                  |
|               | ■         | -8.6 | UMOD          | uromodulin (uromucoid, Tamm-Horsfall glycoprotein)                               |
|               | ■         | -7.4 | KNG           | kininogen                                                                        |
| ■             | ■         | -6.5 | RHCG          | Rh type C glycoprotein                                                           |
|               | ■         | -6.5 | SLC12A1       | solute carrier family 12 (sodium/potassium/chloride transporters)                |
|               | ■         | -6.4 | FABP1         | fatty acid binding protein 1, liver                                              |
|               | ■         | -6.4 | CALB1         | calbindin 1, 28kDa                                                               |
|               | ■         | -5.8 | SLC13A2       | solute carrier family 13 (sodium-dependent dicarboxylate transporter)            |
|               | ■         | -5.8 | CYP4F2        | cytochrome P450, subfamily IVF, polypeptide 2                                    |
|               | ■         | -5.7 | PLG           | plasminogen                                                                      |
|               | ■         | -5.3 | SLC22A12      | solute carrier family 22 (organic anion/cation transporter), member 12           |
|               | ■         | -5.1 | CLCNKB        | chloride channel Kb                                                              |
|               | ■         | -5.0 | SLC34A1       | solute carrier family 34 (sodium phosphate), member 1                            |
| ■ ■           | ■         | -4.7 | SLC26A7       | solute carrier family 26, member 7                                               |
| ■             |           | -4.5 | DPEP1         | dipeptidase 1 (renal)                                                            |
|               | ■         | -4.5 | ATP6V1B1      | ATPase, H <sup>+</sup> transporting, lysosomal 56/58kDa, V1 subunit B, isoform 1 |
| ■             |           | -4.4 | CLDN8         | claudin 8                                                                        |
|               | ■         | -4.3 | XAT2          | amino acid transporter XAT2                                                      |
|               | ■         | -4.3 | PCK1          | phosphoenolpyruvate carboxykinase 1 (soluble)                                    |
|               | ■         | -4.3 | KCNJ1         | potassium inwardly-rectifying channel, subfamily J, member 1                     |

|   |   |                    |                                                                       |
|---|---|--------------------|-----------------------------------------------------------------------|
| ■ | ■ | -4.3 SLC4A1        | solute carrier family 4, anion exchanger, member 1                    |
|   | ■ | -4.1 ATP6V0A4      | ATPase, H <sup>+</sup> transporting, lysosomal V0 subunit a isoform 4 |
| ■ |   | -4.1 PTHR1         | parathyroid hormone receptor 1                                        |
|   | ■ | -4.0 SLC13A1       | solute carrier family 13 (sodium/sulfate symporters), member 1        |
|   | ■ | -3.8 SLC4A9        | solute carrier family 4, sodium bicarbonate cotransporter, member 9   |
|   | ■ | -3.7 S100A2        | S100 calcium binding protein A2                                       |
|   | ■ | -3.6 CLCNKA        | chloride channel Ka                                                   |
| ■ |   | -3.6 SFRP1         | secreted frizzled-related protein 1                                   |
|   | ■ | -3.4 DCXR          | dicarbonyl/L-xylulose reductase                                       |
| ■ |   | -3.3 FGF1          | fibroblast growth factor 1 (acidic)                                   |
|   | ■ | -3.2 SLC12A3       | solute carrier family 12 (sodium/chloride transporters), member 3     |
|   | ■ | -3.1 HPGD          | hydroxyprostaglandin dehydrogenase 15-(NAD)                           |
|   | ■ | -3.1 NPHS1         | nephrosis 1, congenital, Finnish type (nephrin)                       |
| ■ |   | -3.1 C7            | complement component 7                                                |
|   | ■ | -2.9 CYP4A11       | cytochrome P450, subfamily IVA, polypeptide 11                        |
| ■ |   | -2.9 DUSP9         | dual specificity phosphatase 9                                        |
|   | ■ | -2.8 DLEC1         | deleted in lung and esophageal cancer 1                               |
|   | ■ | -2.8 SEMA3B        | sema domain, immunoglobulin domain (Ig), short basic domain, 3B       |
|   | ■ | -2.7 KL            | klotho                                                                |
|   | ■ | -2.7 SLC5A2        | solute carrier family 5 (sodium/glucose cotransporter), member 2      |
|   | ■ | -2.6 SCNN1B        | sodium channel, nonvoltage-gated 1, beta (Liddle syndrome)            |
|   | ■ | -2.5 NAP1          | pronapsin A                                                           |
|   | ■ | -2.5 ODZ2          | odd Oz/ten-m homolog 2 (Drosophila, mouse)                            |
|   | ■ | -2.4 CA2           | carbonic anhydrase II                                                 |
| ■ |   | -2.4 AQP2          | aquaporin 2 (collecting duct)                                         |
|   | ■ | -2.4 SLC17A1       | solute carrier family 17 (sodium phosphate), member 1                 |
|   | ■ | -2.3 TINAG         | tubulointerstitial nephritis antigen                                  |
|   | ■ | -2.3 SLC22A7       | solute carrier family 22 (organic anion transporter), member 7        |
|   | ■ | -2.2 FLJ25217      | hypothetical protein FLJ25217                                         |
|   | ■ | -2.2 RGS3          | regulator of G-protein signalling 3                                   |
|   | ■ | -2.2 LOC56898      | oxidoreductase UCPA                                                   |
|   | ■ | -2.2 GSTM3         | glutathione S-transferase M3 (brain)                                  |
|   | ■ | -2.2 CA4           | carbonic anhydrase IV                                                 |
|   | ■ | -2.2 CRHBP         | corticotropin releasing hormone binding protein                       |
|   | ■ | -2.1 BPI           | bactericidal/permeability-increasing protein                          |
| ■ | ■ | -2.1 DKFZP564O0823 | DKFZP564O0823 protein                                                 |
| ■ | ■ | -2.1 IL17BR        | interleukin 17B receptor                                              |
|   | ■ | -2.0 CXCL14        | chemokine (C-X-C motif) ligand 14                                     |
|   | ■ | -2.0 ABCC6         | ATP-binding cassette, sub-family C (CFTR/MRP), member 6               |
|   | ■ | -2.0 SAH           | SA hypertension-associated homolog (rat)                              |
| ■ | ■ | -2.0 NQO2          | NAD(P)H dehydrogenase, quinone 2                                      |
|   | ■ | -2.0 HRG           | histidine-rich glycoprotein                                           |
|   | ■ | -2.0 DD96          | epithelial protein up-regulated in carcinoma                          |
|   | ■ | -1.9 MT2A          | metallothionein 2A                                                    |
|   | ■ | -1.9 ANPEP         | alanyl (membrane) aminopeptidase                                      |
|   | ■ | -1.9 GPHN          | gephyrin                                                              |

|   |      |           |                                                                 |
|---|------|-----------|-----------------------------------------------------------------|
| ■ | -1.9 | KCNK10    | potassium channel, subfamily K, member 10                       |
| ■ | -1.9 | RBP5      | retinol binding protein 5, cellular                             |
| ■ | -1.9 | BMP7      | bone morphogenetic protein 7 (osteogenic protein 1)             |
| ■ | -1.9 | GABARAPL1 | GABA(A) receptor-associated protein like 1                      |
| ■ | -1.9 | PDCD8     | programmed cell death 8 (apoptosis-inducing factor)             |
| ■ | -1.8 | IGFBP2    | insulin-like growth factor binding protein 2, 36kDa             |
| ■ | -1.8 | GGT2      | gamma-glutamyltransferase 2                                     |
| ■ | -1.8 | MST1      | macrophage stimulating 1 (hepatocyte growth factor-like)        |
| ■ | -1.8 | FHIT      | fragile histidine triad gene                                    |
| ■ | -1.8 | CHI3L1    | chitinase 3-like 1 (cartilage glycoprotein-39)                  |
| ■ | -1.8 | BDKRB2    | bradykinin receptor B2                                          |
| ■ | -1.8 | MEST      | mesoderm specific transcript homolog (mouse)                    |
| ■ | -1.7 | CYFIP2    | cytoplasmic FMR1 interacting protein 2                          |
| ■ | -1.7 | PAX2      | paired box gene 2                                               |
| ■ | -1.7 | FUT3      | fucosyltransferase 3 (galactoside 3(4)-L-fucosyltransferase)    |
| ■ | -1.6 | SLC22A2   | solute carrier family 22 (organic cation transporter), member 2 |
| ■ | -1.6 | ABCB1     | ATP-binding cassette, sub-family B (MDR/TAP), member 1          |
| ■ | -1.6 | PRKCE     | protein kinase C, epsilon                                       |
| ■ | -1.6 | ALPL      | alkaline phosphatase, liver/bone/kidney                         |

\* The gene symbol we report is the one used in the unigene database as recorded in the NETAFFX database (version March 1, 2003)
